# Supplementary material for: Heart Failure–Related Death in Subjects With Atrial Fibrillation in the United States, 1999 to 2020
Source: PubMed Central journal article supplement — J Am Heart Assoc. 2024 Apr 30;13(9):e033897. doi: 10.1161/JAHA.123.033897 (PMC11179935; doi:10.1161/jaha.123.033897), 2024-04-30
Supplement: JAH3-13-e033897-s001.pdf [file JAH3-13-e033897-s001.pdf]

# **SUPPLEMENTAL MATERIAL**

**Table S1. Age-Adjusted Mortality rate trend in US subjects with heart failure and atrial fibrillation, 1999-2020, stratified by census region.**

|           | <b>AAMR 1999<br/>(95% CI)</b> | <b>AAMR 2020<br/>(95% CI)</b> | <b>AAPC; (95% CI), p</b>       | <b>Number of<br/>Joinpoints</b> | <b>Period 1 [years]<br/>APC; (95% CI), p</b>   | <b>APC - period 2 years]<br/>APC; (95% CI), p</b> | <b>p (for parallelism)</b>      |
|-----------|-------------------------------|-------------------------------|--------------------------------|---------------------------------|------------------------------------------------|---------------------------------------------------|---------------------------------|
| Northeast | 8.03<br>(7.80 to 8.26)        | 17.95<br>(17.65 to 18.24)     | +3.4; (3.0 to 3.9),<br>p<0.001 | 1                               | [1999-2009]<br>+1.4; (0.7 to 25.1),<br>p<0.001 | [2009-2020]<br>+5.3; (4.7 to 6.0),<br>p<0.001     | Northeast vs Midwest<br>p=0.004 |
| Midwest   | 8.74<br>(8.52 to 8.97)        | 22.84<br>(22.53 to 23.16)     | +4.4; (3.9 to 4.9),<br>p<0.001 | 1                               | [1999-2012]<br>+2.3; (1.8 to 2.8),<br>p<0.001  | [2012-2020]<br>+7.8;(6.7 to 8.9),<br>p<0.001      | Northeast vs South<br>p= 0.002  |
| South     | 7.27<br>(7.10 to 7.45)        | 19.68<br>(19.46 to 19.70)     | +4.3;(3.8 to 4.7),<br>p<0.001  | 1                               | [1999-2011]<br>+1.9; (1.3 to 2.5),<br>p<0.001  | [2011-2020]<br>+7.5; (6.6 to 8.5),<br>p<0.001     | Northeast vs West<br>p=0.002    |
| West      | 9.09<br>(8.83 to 9.36)        | 21.51<br>(21.21 to 21.81)     | +4.1; (3.7 to 4.4),<br>p<0.001 | 1                               | [1999-2012]<br>+2.9; (2.6 to 3.3),<br>p<0.001  | [2012-2020]<br>+6.0; (5.2 to 6.7),<br>p<0.001     | Midwest vs South<br>p=0.80      |
|           |                               |                               |                                |                                 |                                                |                                                   | Midwest vs West<br>p=0.008      |
|           |                               |                               |                                |                                 |                                                |                                                   | South vs West<br>p=0.009        |

AAMR: Age-adjusted mortality rate, expressed as deaths per 100.000 population. AAPC: Average Annual percent change; APC: Annual percent change. CI: Confidence interval.

**Table S2. Age-Adjusted Mortality rate trend in US subjects with heart failure and atrial fibrillation, 1999-2020, stratified by age.**

|                | <b>AAMR 1999<br/>(95% CI)</b> | <b>AAMR 2020<br/>(95% CI)</b>   | <b>AAPC; (95% CI), p</b>       | <b>Number of<br/>Joinpoints</b> | <b>Period 1 [years]<br/>APC; (95% CI), p</b>  | <b>APC - period 2 years]<br/>APC; (95% CI), p</b> | <b>p (for parallelism)</b> |
|----------------|-------------------------------|---------------------------------|--------------------------------|---------------------------------|-----------------------------------------------|---------------------------------------------------|----------------------------|
| < 65 yrs (All) | 0.23<br>(0.21 to 0.25)        | 1.32<br>(1.28 to 1.36)          | +7.5; (6.7 to 8.4),<br>p<0.001 | 1                               | [1999-2010]<br>+3.9; (2.8 to 5.1),<br>p<0.001 | [2010-2020]<br>+11.6; (10.2 to 13.0),<br>p<0.001  | -                          |
| Males          | 0.33<br>(0.11 to 0.15)        | 1.89<br>(1.83 to 1.96)          | +8.1; (7.4 to 8.7),<br>p<0.001 | 1                               | [1999-2010]<br>+4.7; (3.8 to 5.6),<br>p<0.001 | [2010-2020]<br>+11.9;(10.7 to 13.1),<br>p<0.001   | 0.46                       |
| Females        | 0.13<br>(0.11 to 0.15)        | 0.75<br>(0.71 to 0.79)          | +7.5;(6.3 to 8.6),<br>p<0.001  | 1                               | [1999-2009]<br>+3.7; (1.9 to 5.6),<br>p<0.001 | [2009-2020]<br>+11.0; (9.3 to 12.7),<br>p<0.001   |                            |
| ≥65 yrs (All)  | 62.93<br>(62.09 to<br>63.77)  | 152.90<br>(151.84 to<br>153.96) | +4.0; (3.7 to 4.3),<br>p<0.001 | 1                               | [1999-2011]<br>+2.1; (1.7 to 2.4),<br>p<0.001 | [2011-2020]<br>+6.6; (6.0 to 7.2),<br>p<0.001     | -                          |
| Males          | 66.03<br>(64.54 to<br>67.53)  | 181.05<br>(179.23 to<br>182.88) | +4.6; (4.2 to 4.9),<br>p<0.001 | 1                               | [1999-2011]<br>+2.5; (2.1 to 2.9),<br>p<0.001 | [2011-2020]<br>+7.4;(6.8 to 8.1),<br>p<0.001      | <0.001                     |
| Females        | 60.46<br>(59.45 to<br>61.48)  | 132.26<br>(130.98 to<br>133.54) | +3.5;(3.1 to 3.8),<br>p<0.001  | 1                               | [1999-2011]<br>+1.7; (1.3 to 2.2),<br>p<0.001 | [2011-2020]<br>+5.8; (5.1 to 6.5),<br>p<0.001     |                            |

AAMR: Age-adjusted mortality rate, expressed as deaths per 100.000 population. AAPC: Average Annual percent change; APC: Annual percent change. CI: Confidence interval.

**Table S3. COVID-19 decedents with heart failure and atrial fibrillation in the US during the 2020, stratified by sex.**

|         | <b>N° of deaths</b> | <b>AAMR</b> | <b>(95% CI)</b> | <b>% of deaths</b> |
|---------|---------------------|-------------|-----------------|--------------------|
| All     | 57,373              | 14.23       | 14.18-14.39     | -                  |
| Males   | 30,763              | 17.63       | 17.43-17.83     | 53.6               |
| Females | 26,610              | 10.88       | 10.75-11.01     | 46.4               |
|         |                     |             |                 |                    |
| <65 yrs | 6,758               | 1.95        | 1.90-2.00       | -                  |
| Males   | 4,572               | 2.66        | 2.58-2.74       | 66.9               |
| Females | 2,006               | 1.19        | 1.14-1.25       | 33.1               |
|         |                     |             |                 |                    |
| ≥65 yrs | 50,614              | 97.83       | 96.9-98.68      | -                  |
| Males   | 26,235              | 121.07      | 119.59—122.55   | 51.8               |
| Females | 24,379              | 77.82       | 71.83-78.80     | 48.1               |

AAMR: Age-adjusted mortality rate, expressed as deaths per 100.000 population. CI: Confidence interval.
